Development 139, 1225 (2012) doi:10.1242/dev.080036  
© 2012. Published by The Company of Biologists Ltd

## Dpy19l1, a multi-transmembrane protein, regulates the radial migration of glutamatergic neurons in the developing cerebral cortex

**Keisuke Watanabe, Hirohide Takebayashi, Asim K. Bepari, Shigeyuki Esumi, Yuchio Yanagawa and Nobuaki Tamamaki**

There was an error in *Development* **138**, 4979-4990.

Hirohide Takebayashi's correct e-mail address is [takebaya@med.niigata-u.ac.jp](mailto:takebaya@med.niigata-u.ac.jp)

We apologise to the authors and readers for this mistake.
